# Supplementary material for: DrugPilot: LLM-based Parameterized Reasoning Agent for Drug Discovery
Source: Research Square preprint supplement (doi:10.21203/rs.3.rs-7489358/v1), 2025-09-29
Supplement: Supplementary file 1 [file ae6644337ce5a2b779e9bd27.pdf]

## 912 Appendix A Memory Pool Prompt

**Memory Pool Prompt**

```
# describe responsibilities
You have access to a memory pool. You are responsible for passing in the correct arguments
to the tool you choose to use.

# Define the input format
Each input will consist of two parts:
1. Question description or Observation 2. What parameters are in the memory pool.

# explain how LLM uses memory pool
# when not to use memory pool
You should first try to extract the argument that this tool need from the problem
description, such as 'drug_smiles': 'C=C1C2=CCCC=C(NC(C)C)'.
# when and how to use memory pool
If the question description does not contain this argumennt, then you need to find this
argument in the memory pool, using '(key in the MemoryPool)' to indicate this choice.
You should use () to read MemoryPool.
# give an example
For example, if MemoryPool(arguments=dict_keys(['user_smiles', 'generated_smiles',
'optimized_smiles'])), then you can use 'drug_smiles': '(user_smiles)' or 'drug_smiles':
'(generated_smiles)' or 'drug_smiles': '(optimized_smiles) '.
# wrong example
You cannot use arguments that are not in the memory pool. For example, if MemoryPool does
not contain 'user_target_seq', you should not give 'target_seq': '(user_target_seq)'.
```

**Fig. A1:** Memory pool prompt.

913 To help LLMs better understand the PMP in DrugPilot, we have incorporated a  
 914 memory pool prompt into the system prompt. The full memory pool prompt is shown  
 915 in Fig. A1.

916 The memory pool prompt first clarifies the existence of PMP and the responsibil-  
 917 ities of the LLMs, namely the correct transmission of parameters to the tools. It then  
 918 defines the input format received by the LLMs, comprising two parts: the user’s ques-  
 919 tion or the tool’s output, and a description of the current state of PMP, which includes  
 920 the list of currently stored keys. LLMs can select a key from this pool and map it to  
 921 its corresponding value. It then explains in detail how the LLMs should interact with  
 922 PMP. First, it defines scenarios where PMP should not be used: if the required param-  
 923 eters are already present in the question, the LLMs should extract them directly. Next,  
 924 it specifies when and how to use PMP: if the question lacks the necessary parameters,  
 925 the LLMs must retrieve the corresponding key from the memory pool and enclose it  
 926 in parentheses to indicate retrieval. Finally, the prompt provides both a correct and  
 927 an incorrect example, demonstrating proper memory pool usage and helping LLMs  
 928 avoid retrieving non-existent keys, thereby mitigating hallucination.

## 929 Appendix B DrugPilot’s Reasoning Errors

930 In tool calling, LLMs are required to generate an action input in JSON format, con-  
 931 taining the tool name to be called and required parameters. And in actual tasks, there

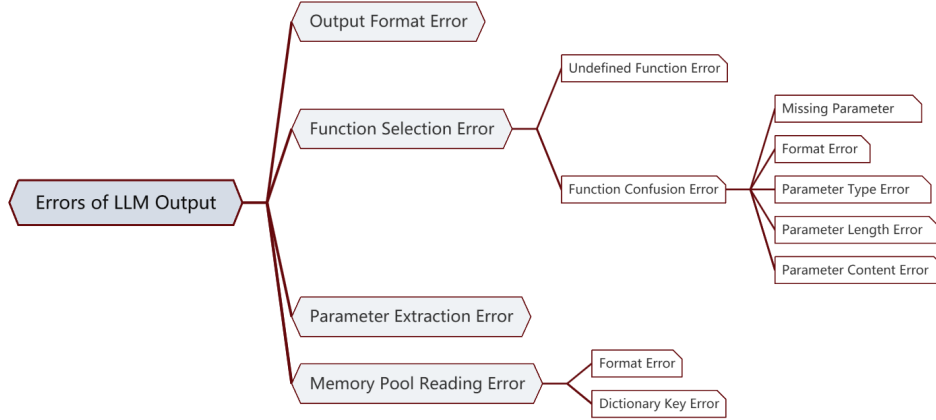

**Fig. B2:** Common reasoning errors of LLMs. The common types of reasoning errors when LLMs call drug-related tools, and the Fe-Fo mechanism will provide feedback to LLMs regarding these issues.

| Hyperparameter          | Value / Strategy |
|-------------------------|------------------|
| Batch size              | 4-8              |
| Cutoff length           | 1024             |
| Optimizer               | AdamW            |
| Initial learning rate   | 5e-5             |
| Learning rate scheduler | Cosine decay     |
| Precision               | BF16             |
| Number of epochs        | 3                |
| Deployment platform     | Ollama           |

**Table C1:** Hyperparameter Settings for Fine-tuning

will be frequent interactions with PMP. Therefore, problems will inevitably arise both in content and format. Based on the real output of LLMs, we summarized the common reasoning errors as shown in Fig.B2.

## Appendix C Fine-Tuning Configuration

We conducted LoRA fine-tuning on the LLMs used in DrugPilot to enhance their domain knowledge in drug discovery and improve their ability to call drug-related tools. Batch size of 4 was used for smaller models, and 8 for larger ones. We deployed the final inference-stage LLMs on the Ollama<sup>1</sup> platform. The hyperparameter settings used during the fine-tuning process are detailed in Table C1.

<sup>1</sup><https://github.com/ollama/ollama>.

| Datasets             | Metrics   | Molecule Generation Task                   |                           |                             |                           |
|----------------------|-----------|--------------------------------------------|---------------------------|-----------------------------|---------------------------|
|                      |           | CDGS [59]                                  | GruM-2D [60]              | MOOD [61]                   | RMCD (Ours)               |
| QM9 + GDSCv2         | FCD ↓     | 77.0 / 61.1 / 53.1                         | 85.3 / 60.7 / 52.7        | 80.2 / 57.7 / 48.7          | <b>77.0 / 56.0 / 47.8</b> |
|                      | MMD ↓     | .340 / .142 / .110                         | .337 / .138 / .106        | .347 / .195 / .144          | <b>.313 / .142 / .101</b> |
| Datasets             | Metrics   | Molecular Optimization Task                |                           |                             |                           |
|                      |           | Prompt-MolOpt [62]                         | HN-GFN [63]               | FFLOM [64]                  | FMOP (Ours)               |
| QM9 + GDSCv2         | Success ↑ | 91.68%                                     | 92.70%                    | 88.83%                      | <b>95.43%</b>             |
|                      | Improv. ↑ | 5.70%                                      | 3.30%                     | 6.3%                        | <b>7.50%</b>              |
| Datasets             | Metrics   | Drug Target Interaction Prediction Task    |                           |                             |                           |
|                      |           | FOTF-CPI [65]                              | HiGraphDTI [66]           | MGN DTI [67]                | SiamDTI (Ours)            |
| BindingDB            | AUROC ↑   | 0.506 ± 0.030                              | 0.540 ± 0.030             | 0.524 ± 0.032               | <b>0.554 ± 0.016</b>      |
| BioSNAP              |           | 0.590 ± 0.030                              | 0.629 ± 0.030             | 0.601 ± 0.012               | <b>0.636 ± 0.020</b>      |
| Datasets             | Metrics   | Drug Target Affinity Prediction Task       |                           |                             |                           |
|                      |           | RF [68]                                    | MSGNN-DTA [69]            | HGRL-DTA [70]               | CLG-DTA (Ours)            |
| KIBA                 | PCC ↑     | 0.150                                      | 0.116                     | 0.083                       | <b>0.280</b>              |
|                      | MSE ↓     | 0.962                                      | 0.907                     | 1.024                       | <b>0.900</b>              |
| Datasets             | Metrics   | Molecular Property Prediction Task         |                           |                             |                           |
|                      |           | KCL [71]                                   | GROVER [72]               | CoMPT [73]                  | KCHML (Ours)              |
| QM7                  | MSE ↓     | 59.9 ± 2.8                                 | 90 ± 1.9                  | 86.5 ± 1.3                  | <b>56.1 ± 3.5</b>         |
| QM8                  |           | 0.0130 ± 0.013                             | 0.0180 ± 0.001            | 0.0187 ± 0.001              | <b>0.0121 ± 0.000</b>     |
| ESOL                 | RMSE ↓    | 0.659 ± 0.019                              | 1.435 ± 0.283             | 0.832 ± 0.039               | <b>0.612 ± 0.142</b>      |
| FreeSolv             |           | 1.148 ± 0.257                              | 2.935 ± 0.620             | 1.940 ± 0.808               | <b>1.136 ± 0.142</b>      |
| Lipo                 | ROC-AUC ↑ | 0.566 ± 0.007                              | 0.829 ± 0.010             | 0.647 ± 0.028               | <b>0.527 ± 0.009</b>      |
| BACE                 |           | 93.00 ± 0.69                               | 82.34 ± 8.83              | 82.47 ± 0.69                | <b>94.57 ± 1.63</b>       |
| BBBP                 |           | 95.38 ± 1.70                               | 84.37 ± 4.10              | 94.57 ± 1.20                | <b>95.89 ± 1.66</b>       |
| Datasets             | Metrics   | Drug-Drug Interaction Prediction Task      |                           |                             |                           |
|                      |           | GMPNN [74]                                 | DGNN-DDI [75]             | DSN-DDI [76]                | KCHML (Ours)              |
| TwoSide <sup>a</sup> | AUC ↑     | 77.69 ± 0.26                               | 77.25 ± 0.23              | 77.25 ± 0.23                | <b>81.87 ± 0.54</b>       |
| TwoSide <sup>b</sup> |           | 80.91 ± 0.80                               | 81.96 ± 0.26              | 81.59 ± 0.66                | <b>83.75 ± 0.89</b>       |
| Datasets             | Metrics   | Drug Response Prediction Task <sup>c</sup> |                           |                             |                           |
|                      |           | MSDA <sub>GraTransDRP</sub>                | MSDA <sub>TransEDRP</sub> | CLDR <sub>GraTransDRP</sub> | CLDR <sub>TransEDRP</sub> |
| GDSCv2               | PCC ↑     | 0.5103 (5.3%)                              | 0.5316 (+5.1%)            | <b>0.5288 (+11.61%)</b>     | 0.5149 (+1.77%)           |
|                      | MSE ↓     | 0.0039 (+20.6%)                            | 0.0044 (15.2%)            | 0.0039 (+17.02%)            | <b>0.0038 (+26.23%)</b>   |
| Datasets             | Metrics   | Drug Retrosynthesis Task                   |                           |                             |                           |
|                      |           | GET-LT1 [77]                               | SCROP [78]                | RetroXpert [79]             | CFC-Retro (Ours)          |
| USPTO-50K            | Top-1 ↑   | 59.1                                       | 59.0                      | 62.1                        | <b>65.9</b>               |
|                      | Top-3 ↑   | 73.4                                       | 74.8                      | 75.8                        | <b>80.4</b>               |
|                      | Top-5 ↑   | 76.4                                       | 78.1                      | 78.5                        | <b>82.4</b>               |

<sup>a</sup>: Both molecules unseen in training data. <sup>b</sup>: Only one molecule present in training.

<sup>c</sup>: MSDA and CLDR are enhancement plug-ins introduced by Ours to improve the performance of baseline methods such as GraTransDRP [80] and TransEDRP [81].

**Table C2:** Performance comparison across task-specific AI model zoo. The results demonstrate how our methods perform across different tasks, in comparison with the current SOTA methods.

## 941 Appendix D AI Model Zoo

942 DrugPilot is designed to facilitate the accurate and efficient execution of multiple tasks  
 943 within the drug research and development pipeline by leveraging tool calling mecha-  
 944 nisms. For each specific task, there are various models that are tailored to complete

945 the task. Table [C2](#) presents a comprehensive comparison of the performance achieved  
946 by our method against a range of SOTA baselines. Our method consistently achieves  
947 superior performance across all tasks, which ensures the reliability and effectiveness of  
948 individual task execution. Consequently, this contributes to the enhanced robustness  
949 of the overall DrugPilot workflow.
